# Supplementary material for: SNX12 Role in Endosome Membrane Transport
Source: PubMed Central journal article supplement (PMC3376135; doi:10.1371/journal.pone.0038949), 2012-06-15

Figure-S1 (Pons)

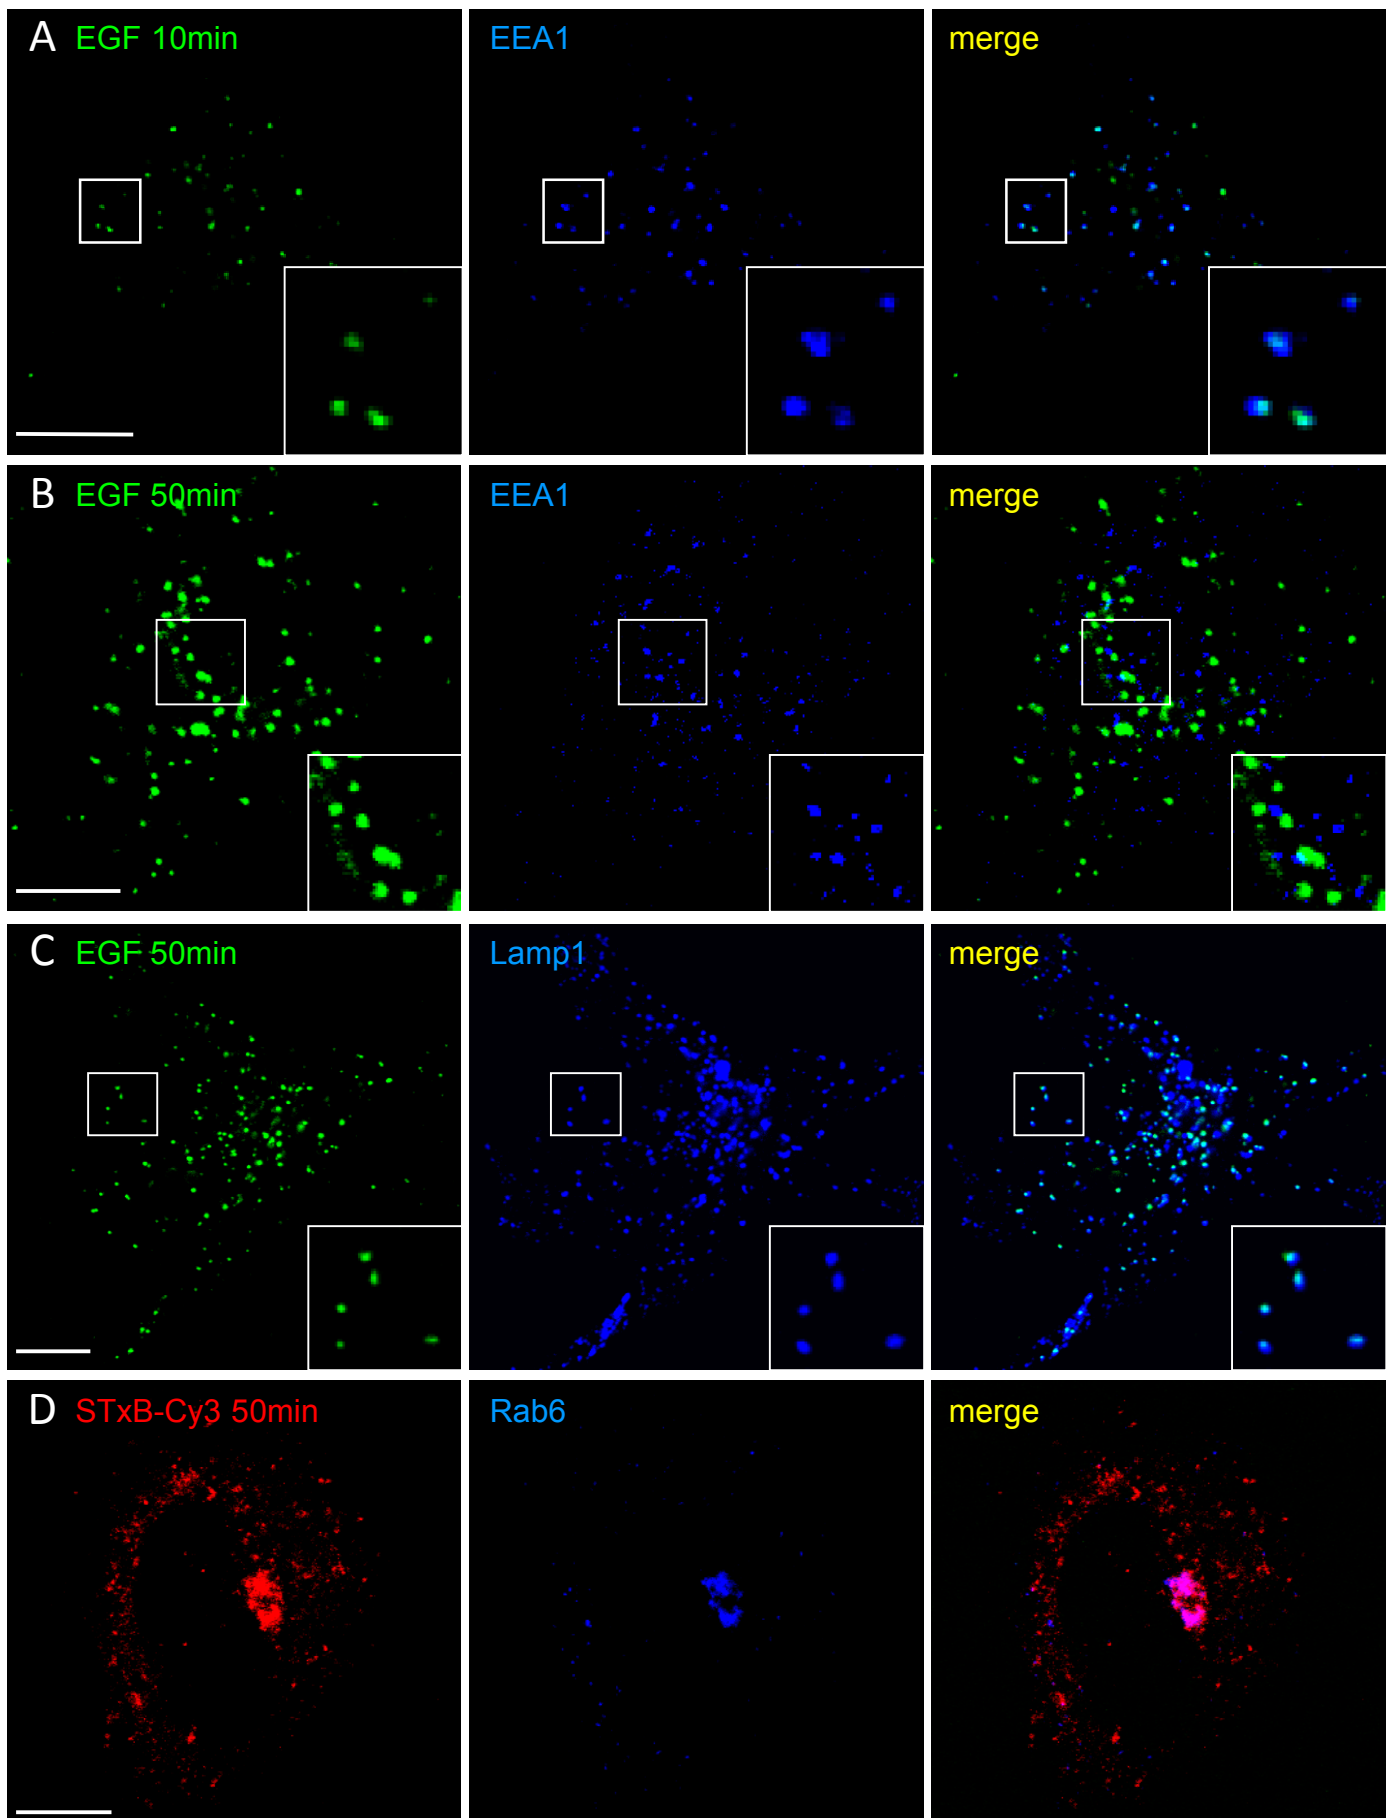

Supplement: pone.0038949.s001.pdf [file pone.0038949.s001.pdf]
