# Supplementary material for: SNX12 Role in Endosome Membrane Transport
Source: PubMed Central journal article supplement (PMC3376135; doi:10.1371/journal.pone.0038949), 2012-06-15

Figure-S3 (Pons)

A

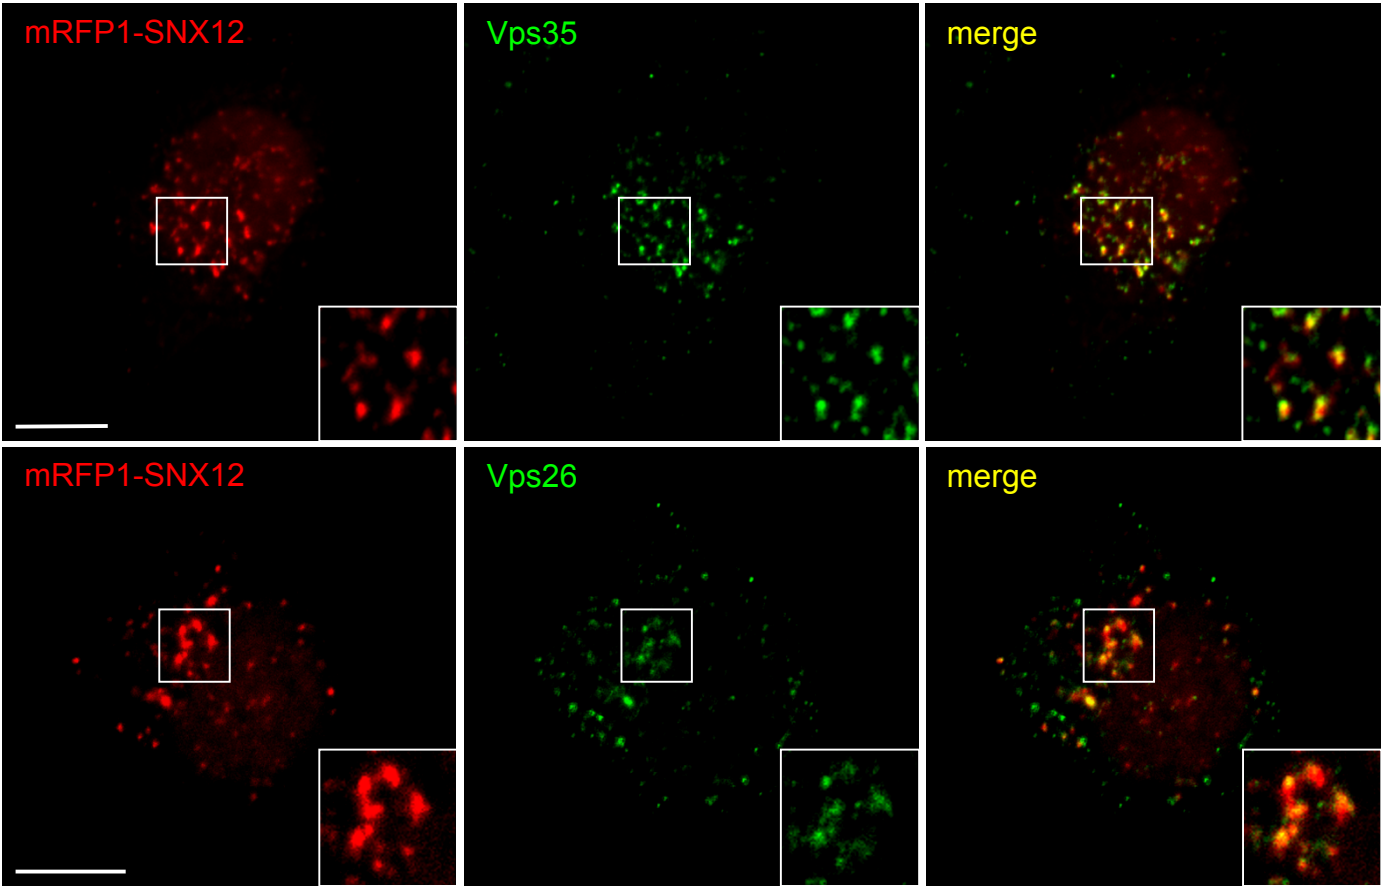

B

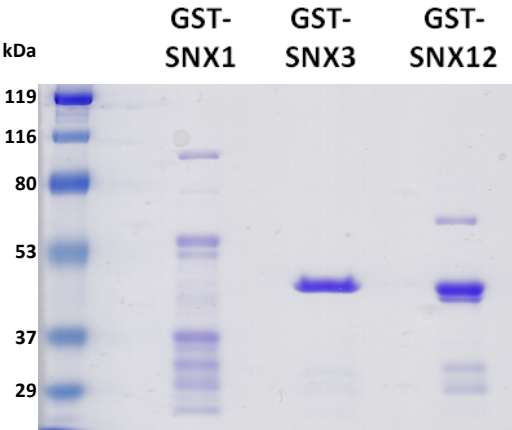

C

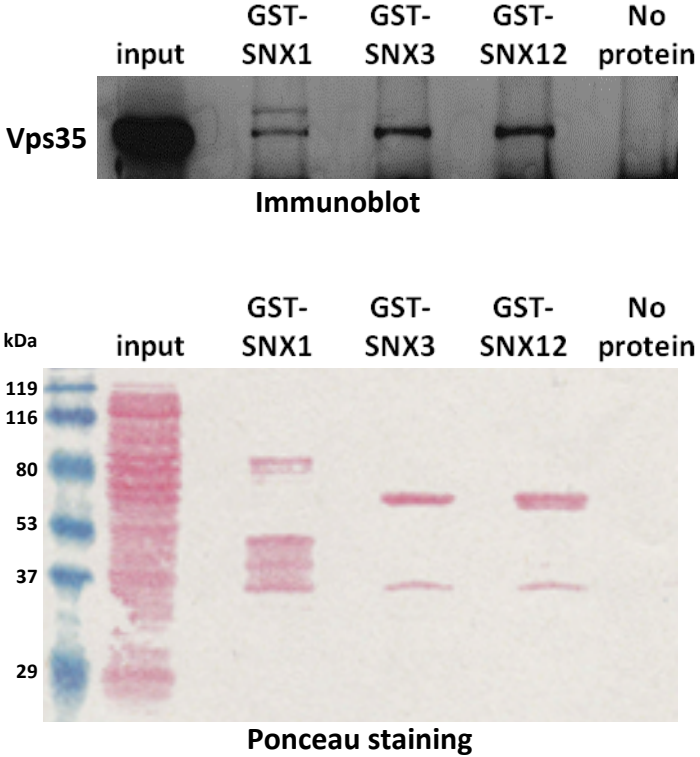

Supplement: pone.0038949.s003.pdf [file pone.0038949.s003.pdf]
